# Supplementary material for: A Real-world cost-effectiveness study of autologous stem cell transplant plus CAR-T versus CAR-Ttherapy alone in Chinese patients with relapsed/refractory large B-cell lymphoma
Source: Research Square preprint supplement (doi:10.21203/rs.3.rs-4372075/v1), 2024-05-17
Supplement: Supplementary file 1 [file 0704024428dd1041849c823f.pdf]

## Supplementary Materials

**Table 1** Characteristics of patients after propensity score matching (PSM) in the in-hospital CAR-T group.

| Variable                 | CART,<br>N = 35 | ASCT+CART,<br>N = 35 | p-value |
|--------------------------|-----------------|----------------------|---------|
| <b>Age</b>               |                 |                      | 0.6     |
| Mean (SD)                | 46.83 (11.79)   | 47.86 (11.63)        |         |
| <b>Sex, n (%)</b>        |                 |                      | >0.9    |
| Male                     | 19.0 (54.3%)    | 19.0 (54.3%)         |         |
| Female                   | 16.0 (45.7%)    | 16.0 (45.7%)         |         |
| <b>ECOG score, n (%)</b> |                 |                      | >0.9    |
| 0                        | 1.0 (2.9%)      | 0.0 (0.0%)           |         |
| 1                        | 21.0 (60.0%)    | 21.0 (60.0%)         |         |
| 2                        | 13.0 (37.1%)    | 14.0 (40.0%)         |         |
| <b>IPI score, n (%)</b>  |                 |                      | 0.4     |
| 0                        | 1.0 (2.9%)      | 0.0 (0.0%)           |         |
| 1                        | 0.0 (0.0%)      | 1.0 (2.9%)           |         |
| 2                        | 9.0 (25.7%)     | 13.0 (37.1%)         |         |
| 3                        | 19.0 (54.3%)    | 13.0 (37.1%)         |         |
| 4                        | 6.0 (17.1%)     | 7.0 (20.0%)          |         |
| 5                        | 0.0 (0.0%)      | 1.0 (2.9%)           |         |
| <b>LDH, n (%)</b>        |                 |                      | >0.9    |
| Increased                | 34.0 (97.1%)    | 35.0 (100.0%)        |         |
| Decreased                | 1.0 (2.9%)      | 0.0 (0.0%)           |         |
| <b>Staging, n (%)</b>    |                 |                      | >0.9    |
| II A                     | 1.0 (2.9%)      | 2.0 (5.7%)           |         |
| III A                    | 6.0 (17.1%)     | 5.0 (14.3%)          |         |
| III B                    | 1.0 (2.9%)      | 1.0 (2.9%)           |         |
| IV A                     | 19.0 (54.3%)    | 21.0 (60.0%)         |         |
| IV B                     | 8.0 (22.9%)     | 6.0 (17.1%)          |         |
| <b>Type of CAR-T</b>     |                 |                      |         |
| In-hospital              | 35.0 (100.0%)   | 35.0 (100.0%)        |         |

**Table 2** Characteristics of patients after propensity score matching (PSM) in the CAR-T group.

| Variable                    | Commercial, N = 5 | In-hospital, N = 5 |
|-----------------------------|-------------------|--------------------|
| <b>Age</b>                  |                   |                    |
| Mean (SD)                   | 52.40 (14.89)     | 45.60 (12.48)      |
| <b>Sex, n (%)</b>           |                   |                    |
| Male                        | 4.0 (80.0%)       | 5.0 (100.0%)       |
| Female                      | 1.0 (20.0%)       | 0.0 (0.0%)         |
| <b>ECOG score, n (%)</b>    |                   |                    |
| 1                           | 4.0 (80.0%)       | 5.0 (100.0%)       |
| 2                           | 1.0 (20.0%)       | 0.0 (0.0%)         |
| <b>IPI score, n (%)</b>     |                   |                    |
| 2                           | 2.0 (40.0%)       | 2.0 (40.0%)        |
| 3                           | 1.0 (20.0%)       | 3.0 (60.0%)        |
| 4                           | 1.0 (20.0%)       | 0.0 (0.0%)         |
| 5                           | 1.0 (20.0%)       | 0.0 (0.0%)         |
| <b>LDH, n (%)</b>           |                   |                    |
| Increased                   | 5.0 (100.0%)      | 5.0 (100.0%)       |
| <b>Staging, n (%)</b>       |                   |                    |
| III A                       | 1.0 (20.0%)       | 1.0 (20.0%)        |
| IV A                        | 3.0 (60.0%)       | 2.0 (40.0%)        |
| IV B                        | 1.0 (20.0%)       | 2.0 (40.0%)        |
| <b>Type of CAR-T, n (%)</b> |                   |                    |
| Axica-cel                   | 2.0 (40.0%)       | 0.0 (0.0%)         |
| Remlae-cel                  | 3.0 (60.0%)       | 0.0 (0.0%)         |
| In-hospital                 | 0.0 (0.0%)        | 5.0 (100.0%)       |

**Table 3** Characteristics of patients after propensity score matching (PSM) in the ASCT+CAR-T group.

| Variable                   | Commercial, N = 5 | In-hospital, N = 14 |
|----------------------------|-------------------|---------------------|
| <b>Age</b>                 |                   |                     |
| Mean (SD)                  | 49.80 (14.41)     | 47.71 (11.30)       |
| <b>Sex, n (%)</b>          |                   |                     |
| Male                       | 2.0 (40.0%)       | 7.0 (50.0%)         |
| Female                     | 3.0 (60.0%)       | 7.0 (50.0%)         |
| <b>ECOG score, n (%)</b>   |                   |                     |
| 1                          | 2.0 (40.0%)       | 3.0 (21.4%)         |
| 2                          | 3.0 (60.0%)       | 11.0 (78.6%)        |
| <b>IPI score, n (%)</b>    |                   |                     |
| 2                          | 1.0 (20.0%)       | 1.0 (7.1%)          |
| 3                          | 3.0 (60.0%)       | 7.0 (50.0%)         |
| 4                          | 1.0 (20.0%)       | 6.0 (42.9%)         |
| <b>LDH, n (%)</b>          |                   |                     |
| Increased                  | 5.0 (100.0%)      | 14.0 (100.0%)       |
| <b>Staging, n (%)</b>      |                   |                     |
| IV A                       | 4.0 (80.0%)       | 9.0 (64.3%)         |
| IV B                       | 1.0 (20.0%)       | 5.0 (35.7%)         |
| <b>Type of CART, n (%)</b> |                   |                     |
| Axica-cel                  | 3.0 (60.0%)       | 0.0 (0.0%)          |
| Remlae-cel                 | 2.0 (40.0%)       | 0.0 (0.0%)          |
| In-hospital                | 0.0 (0.0%)        | 14.0 (100.0%)       |
